# Supplementary material
Source: Springer Nature journal article supplement (https://www.springermedizin.de/resource/supplementary/13075_2012_3997_MOESM4_ESM.pdf/9695740)

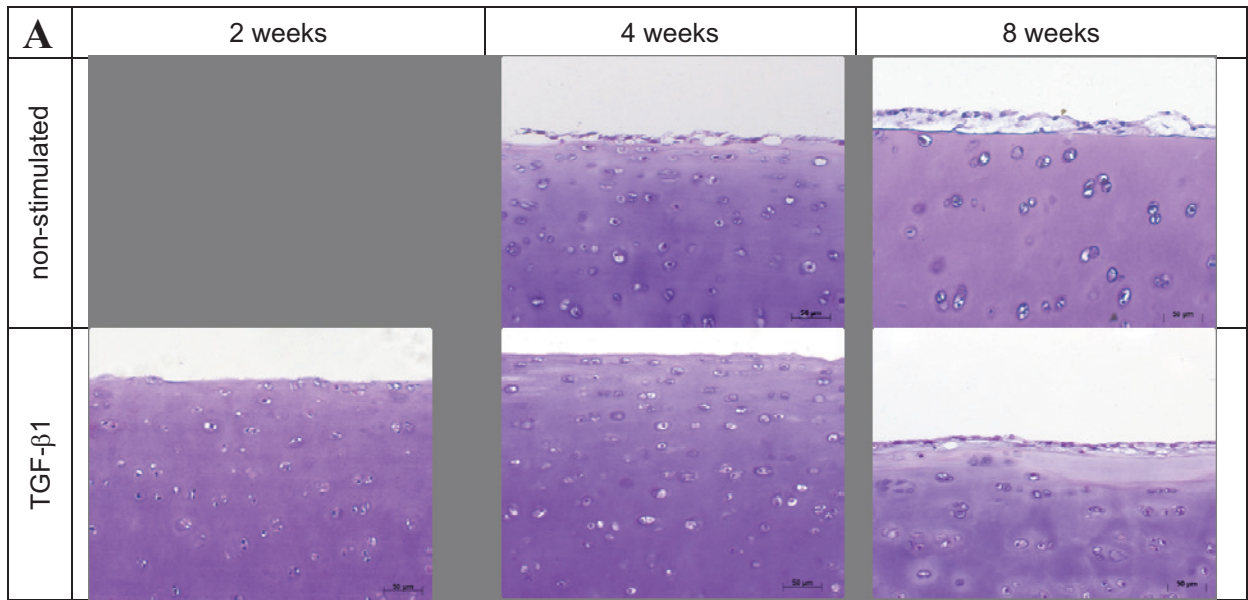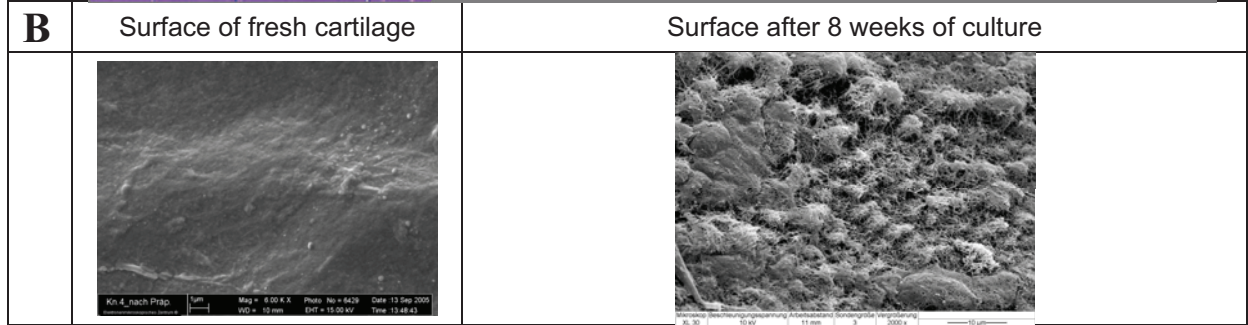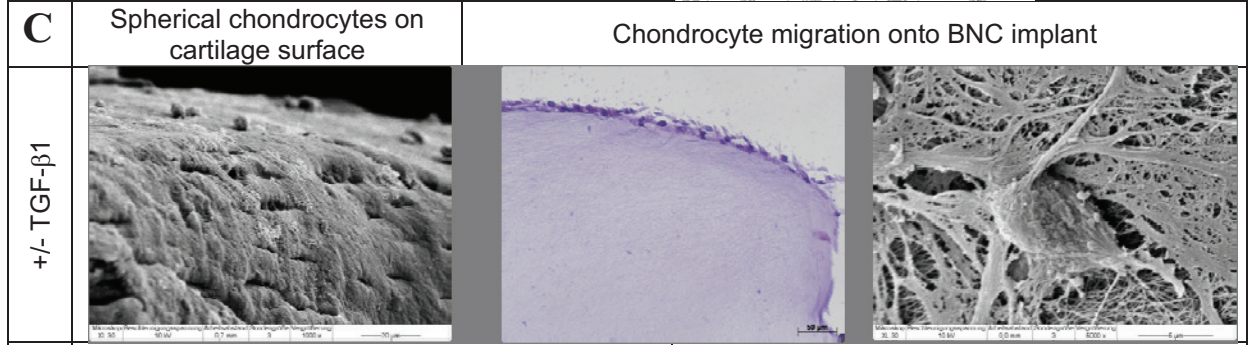

| D | Cartilage erosion | Migration of cells from the cartilage onto BNC surface |
|---|-------------------|--------------------------------------------------------|
|---|-------------------|--------------------------------------------------------|

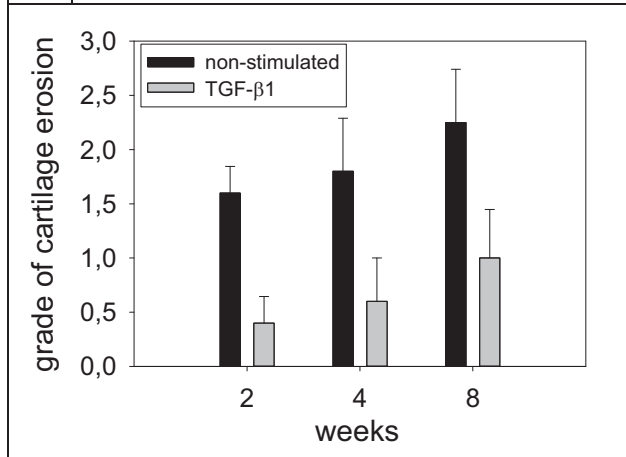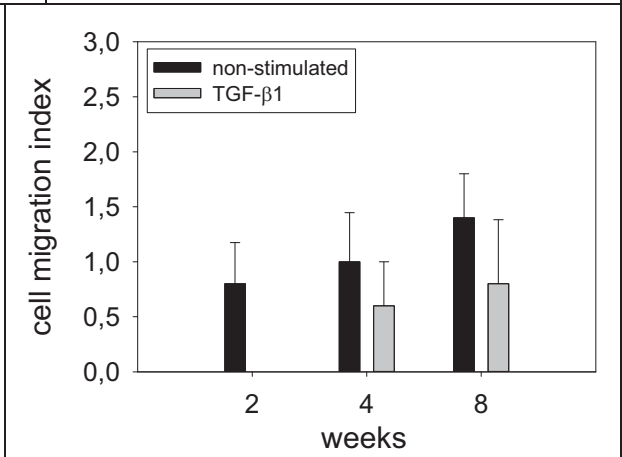

Supplement: MOESM4 [file 9695740]
